# Supplementary material
Source: PubMed Central journal article supplement (PMC6039978)
Supplement: NIHMS952713-supplement-supplement_1.pdf [file NIHMS952713-supplement-supplement_1.pdf]

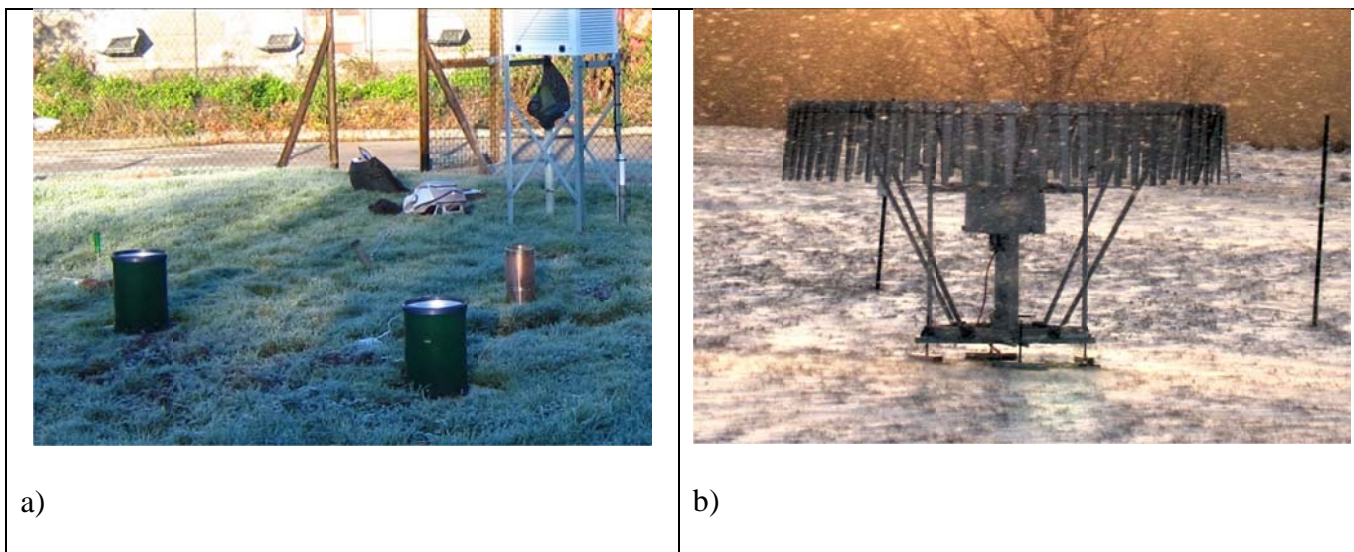

Figure S1 a) Two Casella tipping bucket rain gauges (green) and Snowdon MkII accumulation gauge (copper-color) at the University of Birmingham (UK) Winterbourne II climate station, and b) an OTT-Hydromet Pluvio2 200 weighing gauge with a heated rim, an inner Tretykov shield and an outer alter fence during the GPM Cold-season Precipitation Experiment (GCPEX) in Canada.
